# Supplementary material for: Porphyrinic porous organic frameworks: preparation and post-synthetic modification via demetallation–remetallation
Source: Royal Society of Chemistry journal article supplement (doi:10.1039/c4ta02941k), 2014-01-01
Supplement: c4ta02941k1.pdf [file c4ta02941k1.pdf]

## Electronic Supplementary Information

### **Porphyrinic porous organic frameworks: preparation and post-synthetic modification via demetallation-remetallation**

*Qipu Lin,<sup>a</sup> Jingzhi Lu,<sup>a</sup> Zhaodi Yang,<sup>a, b</sup> Xiaocheng Zeng,<sup>a</sup> and Jian Zhang<sup>\*a</sup>*

<sup>a</sup> Department of Chemistry, University of Nebraska-Lincoln, Lincoln, Nebraska 68588, USA

<sup>b</sup> College of Chemical and Environmental Engineering, Harbin University of Science and Technology,  
Harbin 150040, China

*\* E-mail: jzhang3@unl.edu*

## **Table of Contents**

|                                                                             |            |
|-----------------------------------------------------------------------------|------------|
| <b>A. Gas sorption study</b>                                                | <b>S3</b>  |
| <b>B. Synthesis of monomers</b>                                             | <b>S4</b>  |
| <b>C. Optimization of reaction conditions for the synthesis of por-POFs</b> | <b>S6</b>  |
| <b>D. Characterization of por-POFs</b>                                      | <b>S12</b> |
| <b>E. Demetallation-remetallation of por-POF-8</b>                          | <b>S19</b> |
| <b>F. Computational analysis of binding energies</b>                        | <b>S26</b> |

## A. Gas sorption study

N<sub>2</sub>, H<sub>2</sub>, and CO<sub>2</sub> gas sorption experiments were carried out on a Micromeritics ASAP 2020 surface area and pore size analyzer. Prior to the measurement, the as-synthesized samples were rigorously washed by Soxhlet extraction. After dried in the vacuum oven for overnight, the samples were further activated using the “degas” function of the surface area analyzer for 12 hours at 200 °C. Liquid N<sub>2</sub>, liquid Ar, acetone-dry ice, ice water, and water were used as the temperature controlling media for 77, 87, 195, 273, and 298 K, respectively. Pore size distribution was calculated from the N<sub>2</sub> sorption isotherms based on the NLDFT model in the Micromeritics ASAP 2020 software package.

The isosteric heats of adsorption ( $Q_{st}$ ) were calculated using a virial type thermal equation given below:

$$\ln(P) = \ln(n) + \frac{1}{T} \sum_{i=0}^x a_i n^i + \sum_{i=0}^y b_i n^i$$

where the pressure ( $P$ ) is expressed in mmHg, the amount absorbed ( $n$ ) is expressed in mmol/g, and the temperature ( $T$ ) is expressed in K. The virial coefficients  $a_i$  and  $b_i$  were fit by increasing the respective number of each ( $x$  and  $y$ ) until a sufficient goodness of fit was reached. The values of the virial coefficients  $a_0$  to  $a_x$  were then used to calculate the isosteric heat of adsorption ( $Q_{st}$ ) based on the equation given below:

$$Q_{st} = -R \sum_{i=0}^x a_i n^i$$

## B. Synthesis of monomers

*5,10,15,20-Tetrakis(4-trimethylsilyl-ethynyl)porphyrin-zinc (II) (P1-TMS-Zn)*: Under argon, borontrifluoride etherate ( $\text{BF}_3 \cdot \text{Et}_2\text{O}$ , 0.32 mL, 2.6 mmol) was added to a solution of pyrrole (3.5 mL, 50 mmol) and trimethylsilylpropynal (7.4 mL, 50 mmol) in  $\text{CH}_2\text{Cl}_2$  (750 mL) and the solution was stirred at  $-78^\circ\text{C}$  for 3 h. The mixture was allowed to warm to room temperature. 2,3-dichloro-5,6-dicyano-1,4-benzoquinone (DDQ, 11.5g, 50 mmol) was added and the stirring continued for 5 min. The resulted solution was filtered through silica. The solvent was removed under reduced pressure and the residue was dissolved in  $\text{CH}_2\text{Cl}_2$  and filtered through a short plug of silica again before further purification by flash chromatography ( $\text{SiO}_2/\text{CH}_2\text{Cl}_2/n\text{-hexane}$ ) and recrystallization from dichloromethane/methanol. The resulting compound (1.2 g, 1.75 mmol) and  $\text{Zn}(\text{OAc})_2 \cdot 2\text{H}_2\text{O}$  (2.2 g, 10 mmol, dissolved in 60 mL MeOH) in  $\text{CHCl}_3$  (250 mL) was heated at reflux for 6 h. Water was added to the mixture, which was evaporated under reduced pressure to remove chloroform and methanol, and the residue was filtered to produce a purple powder.  $^1\text{H}$  NMR (400 MHz,  $\text{CDCl}_3$ ):  $\delta$  = 0.646 (s, 36H,  $\text{SiMe}_3$ ), 9.560 (s, 8H,  $\beta$ -pyrrole) ppm. MS (TOF MS ES<sup>+</sup>): calcd. for  $\text{C}_{40}\text{H}_{44}\text{N}_4\text{Si}_4\text{Zn}$  [•] 756.1935; found  $m/z$  = 756.1902.

*5,10,15,20-Tetrakis(4-ethynyl)porphyrin-zinc (II) (P1-Zn)*: To a solution of **P1-TMS-Zn** (1.25 g, 1.6 mmol) in a mixture of  $\text{CH}_2\text{Cl}_2$  (150 mL) and THF (100 mL) was added TBAF (10.0 mL, 1M in THF). After the mixture was stirred at room temperature for 1 h under Ar, water (200 mL) was added. The solution was concentrated under reduced pressure, filtered, and washed with water. The blue solid was dried under vacuum to give the product in 96% yield (0.705 g). Without further purification, the product was immediately used for subsequent reactions.

*5,10,15,20-Tetrakis(4-trimethylsilyl-ethynylphenyl)-porphyrin-zinc (II) (P2-TMS-Zn)*: A solution of *p*-(trimethylsilylethynyl)benzaldehyde (4.04 g, 20 mmol) in propionic acid (150 mL) was stirred in a 250 mL three-neck flask for 1 h at  $100^\circ\text{C}$ . Pyrrole (1.38 mL, 20 mmol) was added drop wise and the resulting solution was heated under reflux for 3 h while protected from light using aluminum foil. After the solvent was evaporated, the residue was purified through column chromatography ( $\text{SiO}_2$ ;  $n\text{-hexane}/\text{CHCl}_3$ , from 5:1 to 0:1) to give a purple powder.  $^1\text{H}$  NMR (400 MHz,  $\text{CDCl}_3$ ):  $\delta$  = -2.881 (s, 2H, pyrrole NH), 0.367 (s, 36H,  $\text{SiMe}_3$ ), 7.872&7.852(d, 8H, *m*-H in  $\text{Ph-C}\equiv\text{C}$ ), 8.175&8.154 (d, 8H, *o*-H in  $\text{Ph-C}\equiv\text{C}$ ), 8.853 (s, 8H,

$\beta$ -pyrrole) ppm. The resulting compound (1.53 g, 1.5 mmol) was dissolved in  $\text{CHCl}_3$  (100 mL), and saturated methanol of  $\text{Zn}(\text{OAc})_2 \cdot 2\text{H}_2\text{O}$  (20 mL) was added. The solution was refluxed for 5 h and then cooled to room temperature. The mixture was added with 100 mL  $\text{H}_2\text{O}$  and evaporated under reduced pressure to remove chloroform and methanol, and the residue was filtered to give a purple powder.

*5,10,15,20-Tetrakis(4-ethynylphenyl)-porphyrin-zinc (II) (P2-Zn)*: The porphyrin **P2-TMS-Zn** (1.49 g, 1.5 mmol) was dissolved in THF (100 mL). Then, TBAF (10.0 mL, 1M in THF) was added drop wise to the solution at  $-78^\circ\text{C}$ . The temperature was raised to room temperature slowly and kept overnight. To the reaction mixture, water (100 mL) was added and extracted with  $\text{CHCl}_3$  ( $3 \times 150$  mL). The organic phase was evaporated to dry to give the product as light purple solid. Yield: 2.0 g, 97%. Without further purification, the product was immediately used for subsequent reactions.

*Tetrakis(4-iodophenyl)methane (I5)*: A suspension of tetraphenylmethane (7.52 g, 23.5 mmol), bis(trifluoroacetoxy)iodobenzene (23.5 g, 54.6 mmol), and iodine (12.4g, 49.8 mmol) in carbon tetrachloride (150 mL) was stirred at  $50\text{--}60^\circ\text{C}$  until the color of iodine disappeared. Carbon tetrachloride was removed by evaporation. The residue was washed with ethanol and acetone and purified by recrystallization in THF to yield 10.9 g (56%) of tetrakis(*p*-iodophenyl)methane as a white crystalline solid.  $^1\text{H}$  NMR (400 MHz,  $\text{CDCl}_3$ ):  $\delta$  = 6.90 (dd, 8H, *o*-H in Ph), 7.70 (dd, 8H, *m*-H in Ph).

*1,3,5,7-Tetrakis(4-iodophenyl)adamantane (I6)*: Iodine (2.36 g, 9.06 mmol) was added to a suspension of tetraphenyladamantane (2.00 g, 4.54 mmol) in chloroform (50 mL) and stirred until the iodine dissolved. Then, (bis(trifluoroacetoxy)iodo)benzene (3.90 g, 9.06 mmol) was added and the suspension was stirred for 24 h at room temperature. The mixture was filtered and the organic layer was washed with  $\text{NaHSO}_3$  (5%, 50 mL), water (50 mL), brine (50 mL), and dried over  $\text{MgSO}_4$ . The product was crystallized in a chloroform/methanol mixture (9:1) to give colorless crystals of the product (1.90 g, 2.01 mmol, 44%).  $^1\text{H}$  NMR (400 MHz,  $\text{CDCl}_3$ ):  $\delta$  = 2.05 (s, 12H,  $\text{CH}_2$  in adamantane), 7.17 (dd, 8H, *o*-H in Ph), 7.65 (dd, 8H, *m*-H in Ph).

## C. Optimization of reaction conditions for the synthesis of por-POFs

### 1. Solvent

**por-POF-7-solv:** The polymerization reactions of **P2-Zn** (0.13g, 0.2 mmol) and **I3** (0.12g, 0.2 mmol) in the presence of catalyst  $\text{Pd}_2(\text{dba})_3/\text{AsPh}_3$  were performed in different solvents [solvent: $\text{Et}_3\text{N}$  = 80 mL:20 mL, solvent = THF, dioxane, NMP, DMF, THF/DMF (1:1)].

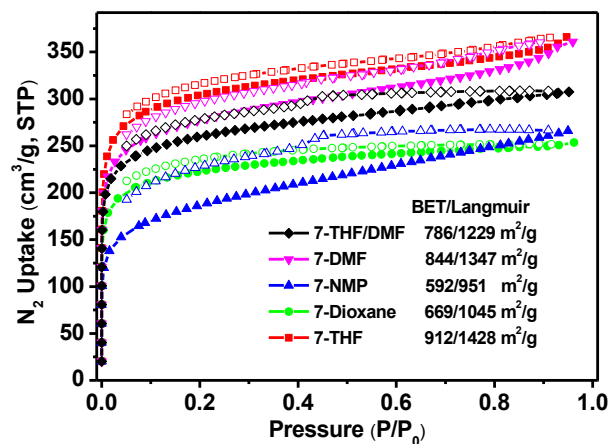

Fig. S1  $\text{N}_2$  sorption isotherms of por-POF-7-solv.

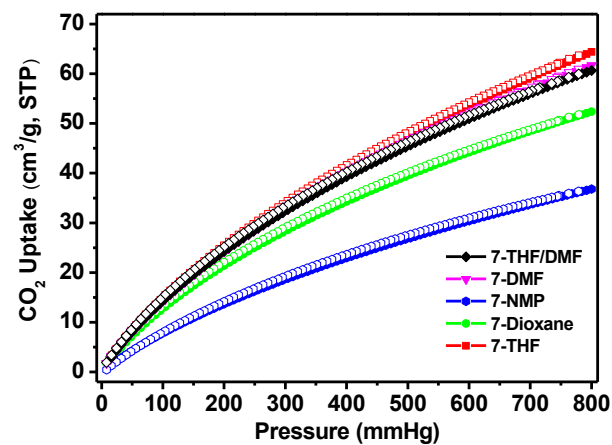

Fig. S2  $\text{CO}_2$  sorption isotherms of por-POF-7-solv.

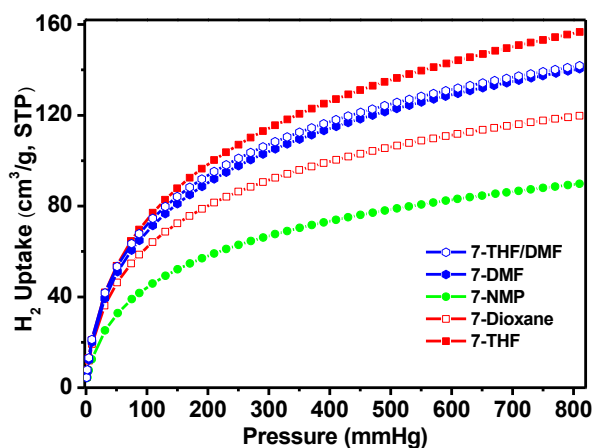

Fig. S3 H<sub>2</sub> sorption isotherms of por-POF-7-solv.

## 2. Reaction temperature

**por-POF-7-temp:** The polymerization reactions of **P2-Zn** (0.13g, 0.2 mmol) and **I3** (0.12g, 0.2 mmol) in the presence of catalyst Pd<sub>2</sub>(dba)<sub>3</sub>/AsPh<sub>3</sub> were carried out in a solvent mixture of anhydrous THF:Et<sub>3</sub>N (80 mL:20 mL) at different temperatures (20 °C, 50 °C, 80 °C, and 100 °C).

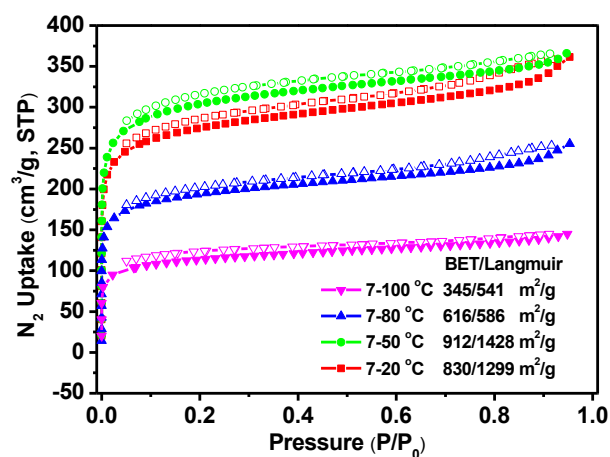

Fig. S4 N<sub>2</sub> sorption isotherms of por-POF-7-temp.

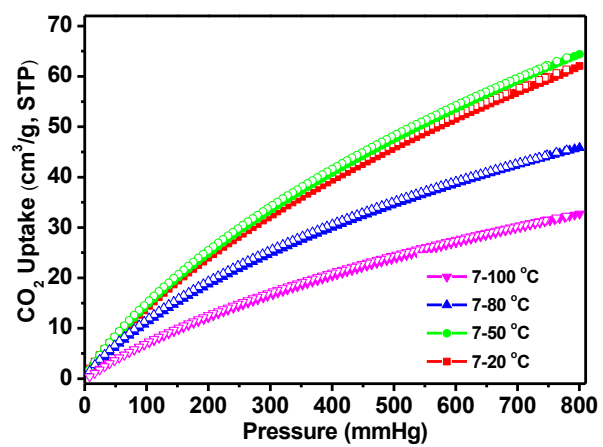

**Fig. S5** CO<sub>2</sub> sorption isotherms of por-POF-7-temp.

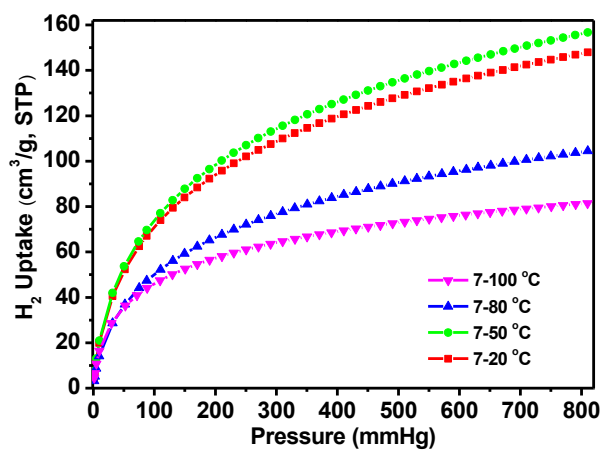

**Fig. S6** H<sub>2</sub> sorption isotherms of por-POF-7-temp.



### 3. Monomer concentration

**por-POF-7-conc:** The polymerization reactions of **P2-Zn** (0.13g, 0.2 mmol) and **I3** (0.12g, 0.2 mmol) in the presence of catalyst  $\text{Pd}_2(\text{dba})_3/\text{AsPh}_3$  were carried out in different amount of solvent THF: $\text{Et}_3\text{N}$  (4:1, v/v). (20 mM, 40 mM, and 200 mM)

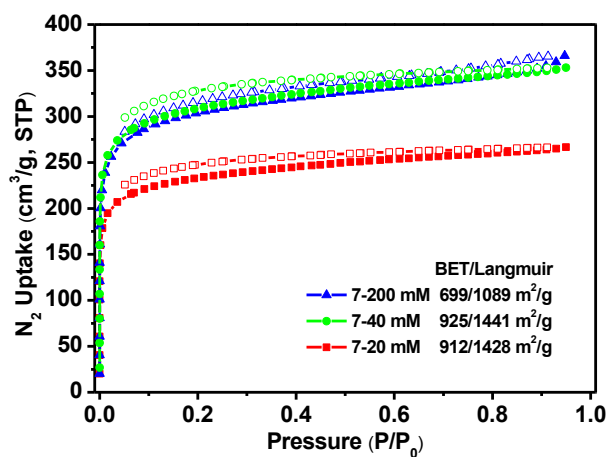

Fig. S7  $\text{N}_2$  sorption isotherms of por-POF-7-conc.

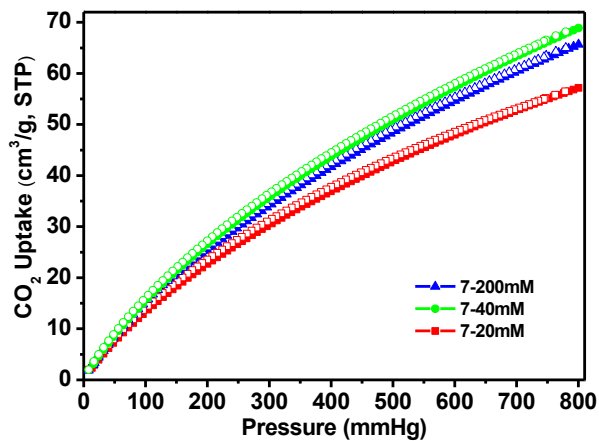

Fig. S8  $\text{CO}_2$  sorption isotherms of por-POF-7-conc.

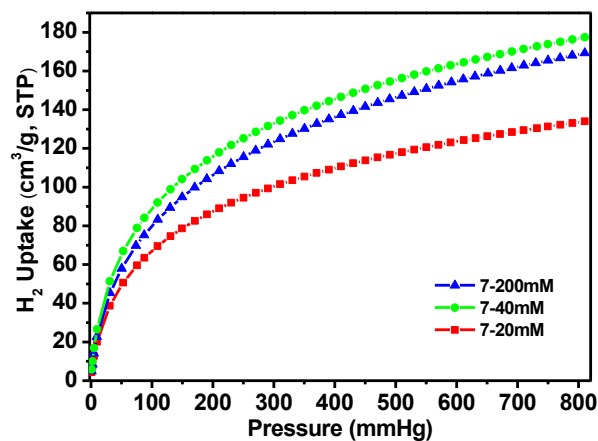

Fig. S9 H<sub>2</sub> sorption isotherms of por-POF-7-conc.

#### 4. Ratio of monomer

**por-POF-7-ratio:** The polymerization reactions of **P2-Zn** and **I3** with different ratio in the presence of catalyst Pd<sub>2</sub>(dba)<sub>3</sub>/AsPh<sub>3</sub> were carried out in solvent of THF:Et<sub>3</sub>N (80 mL:20 mL). [ratio = 4:3 (0.2 mmol:0.15 mmol), 3:3 (0.2 mmol:0.2 mmol), 3:4 (0.15 mmol:0.2 mmol), 4:6 (0.2 mmol:0.3 mmol)]

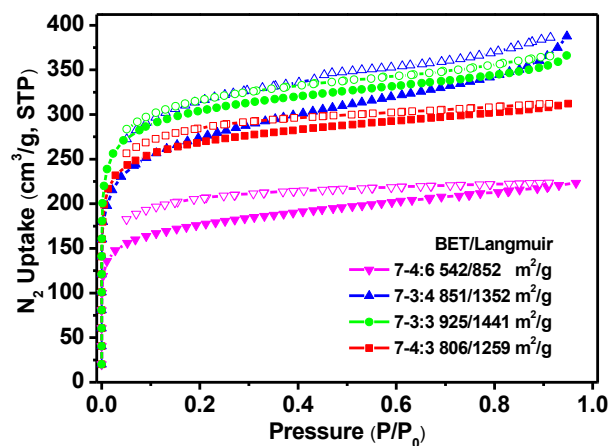

Fig. S10 N<sub>2</sub> sorption isotherms of por-POF-7-ratio.

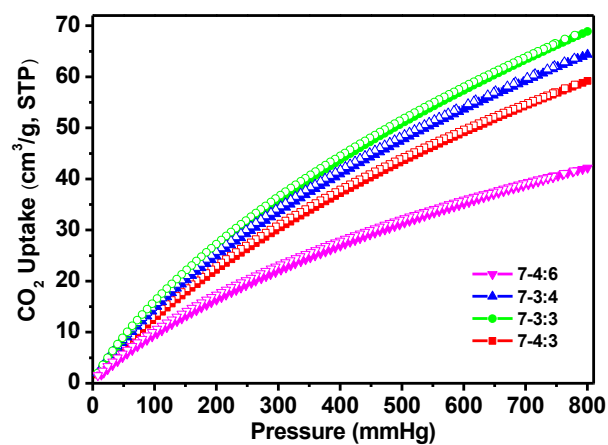

**Fig. S11** CO<sub>2</sub> sorption isotherms of por-POF-7-ratio.

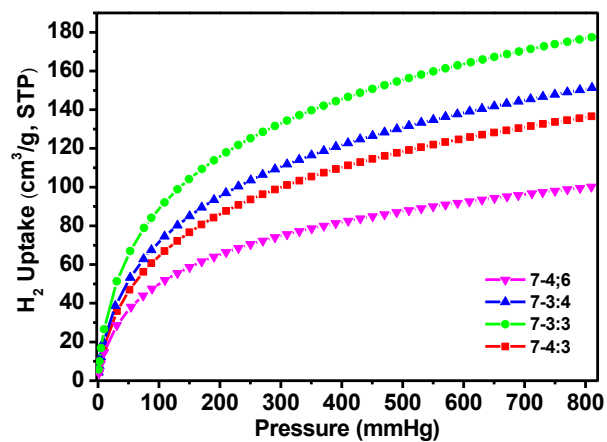

**Fig. S12** H<sub>2</sub> sorption isotherms of por-POF-7-ratio.

## D. Characterization of por-POFs

### 1. Solid-state CP/MAS $^{13}\text{C}$ NMR spectra

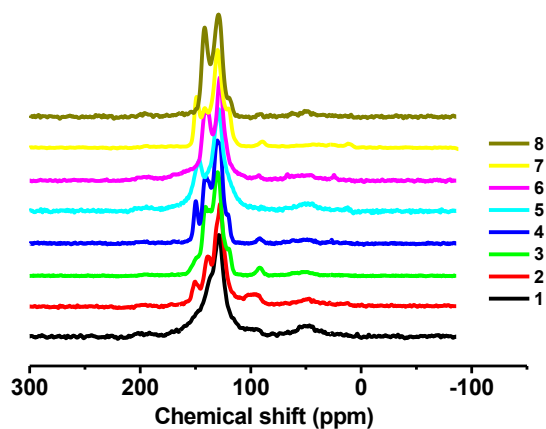

**Fig. S13** Solid-state CP/MAS  $^{13}\text{C}$  NMR spectra of por-POFs (1 to 8).

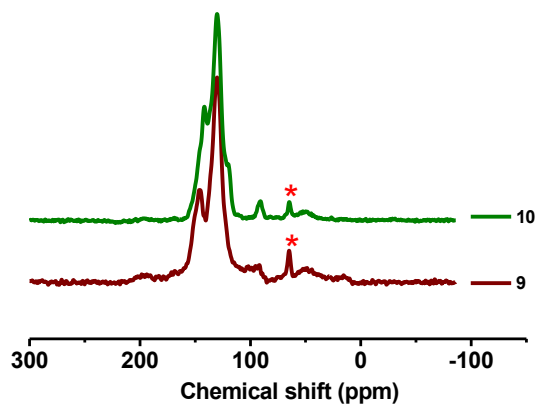

**Fig. S14** Solid-state CP/MAS  $^{13}\text{C}$  NMR spectra of por-POF-9,10. The peak at 64.9 ppm corresponds to the central carbon of the tetraphenylmethane in **I5**.

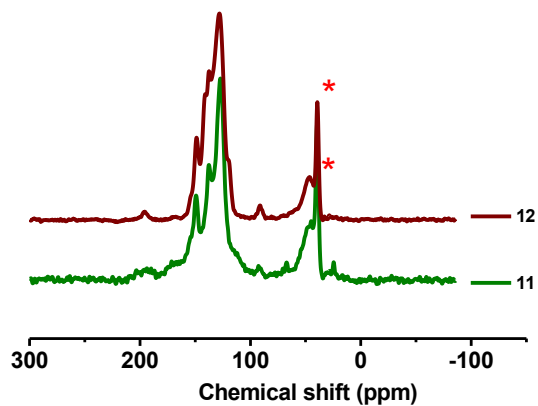

**Fig. S15** Solid-state CP/MAS  $^{13}\text{C}$  NMR spectra of por-POF-**11**,**12**. Peaks at 47.0 and 39.4 ppm correspond to the carbon of methylene groups and quaternary carbon from adamantane moiety in **16**, respectively.

## 2. Fourier transform infrared (FT-IR) spectra

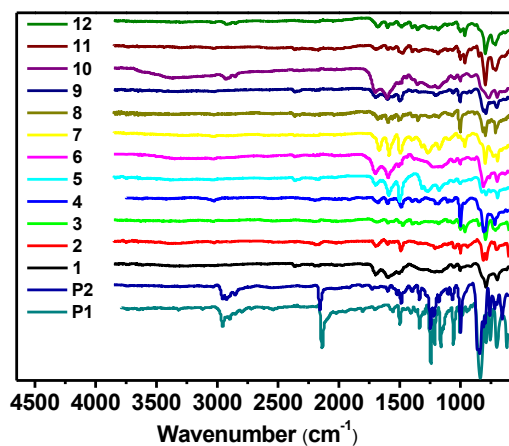

**Fig. S16** FT-IR spectra of por-POF-*n* (*n* = **1** to **12**).

### 3. UV-vis spectra

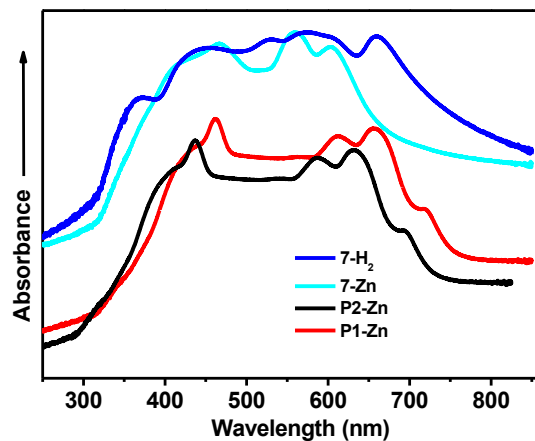

**Fig. S17** Solid state UV-vis diffuse reflectance spectra of por-POF-7-2H, Zn, P1-Zn, and P2-Zn.

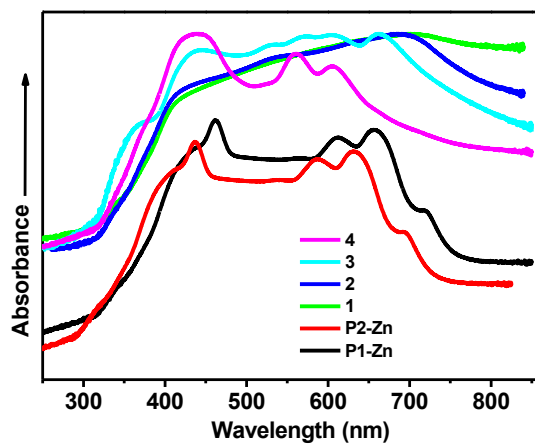

**Fig. S18** Solid state UV-vis diffuse reflectance spectra of por-POF-*n* (*n* = 1 to 4).

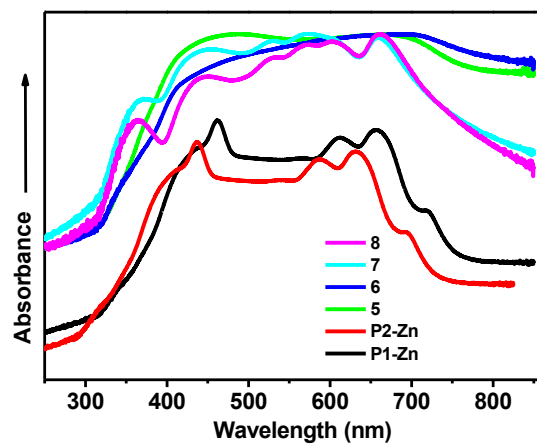

**Fig. S19** Solid state UV-vis diffuse reflectance spectra of por-POF-*n* (*n* = 5 to 8).

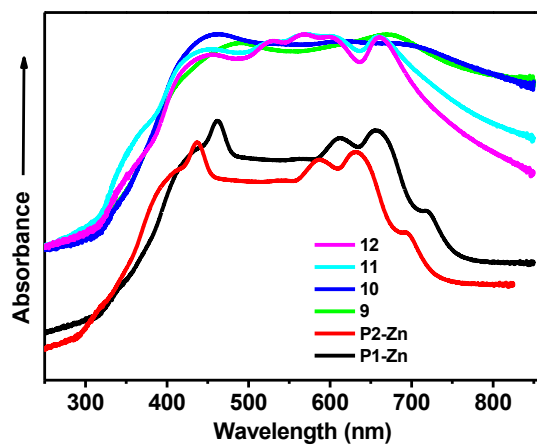

**Fig. S20** Solid state UV-vis diffuse reflectance spectra of por-POF-*n* (*n* = 9 to 12).

#### 4. Thermogravimetric analysis

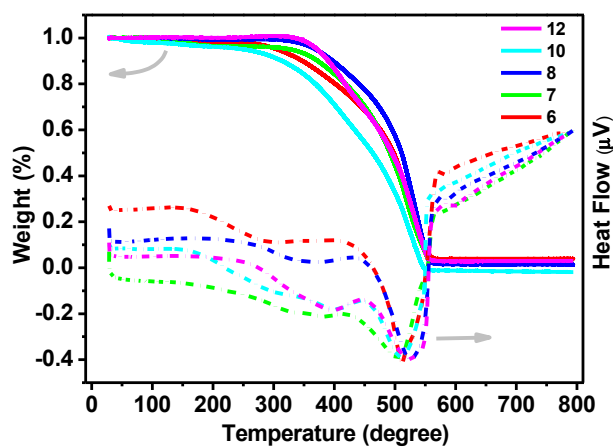

Fig. S21 TGA profiles of por-POFs- $n$  ( $n = 6, 7, 8, 10, 12$ ).

#### 5. N<sub>2</sub>, CO<sub>2</sub>, and H<sub>2</sub> sorption

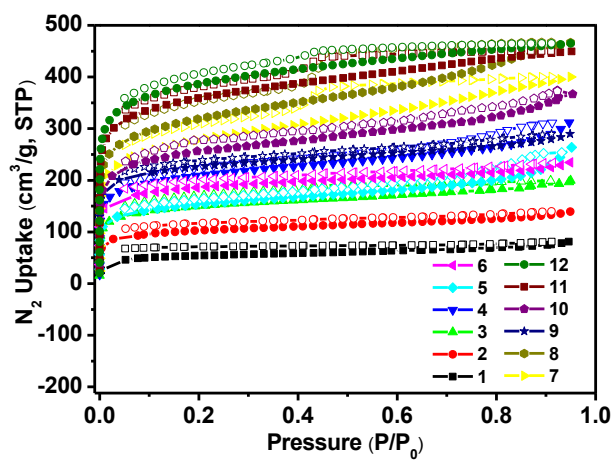

Fig. S22 N<sub>2</sub> sorption isotherms of por-POF- $n$  ( $n = 1$  to 12).



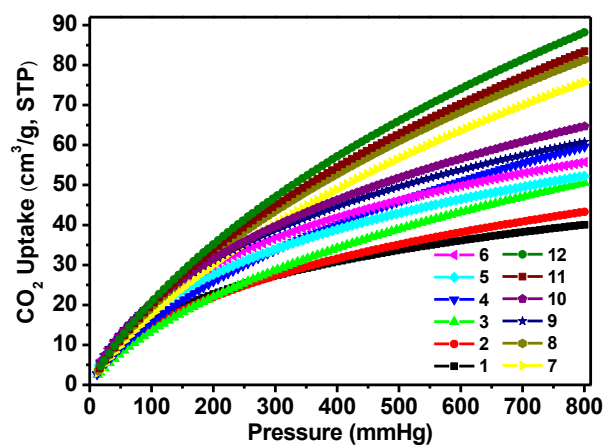

**Fig. S23** CO<sub>2</sub> sorption isotherms of por-POF-*n* (*n* = 1 to 12).

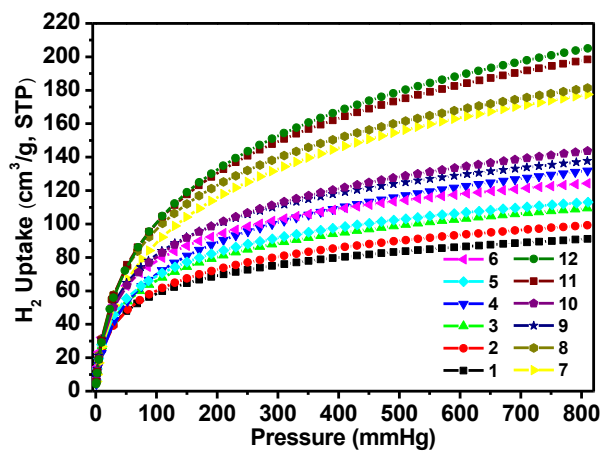

**Fig. S24** H<sub>2</sub> sorption isotherms of por-POF-*n* (*n* = 1 to 12).

**Table S1** Tabular summary of gas sorption capacities and surface areas of por-POFs

|            | <b>S<sub>A</sub>BET</b><br>(m <sup>2</sup> g <sup>-1</sup> ) | <b>S<sub>A</sub>Langmuir</b><br>(m <sup>2</sup> g <sup>-1</sup> ) | <b>S<sub>A</sub>micro</b><br>(m <sup>2</sup> g <sup>-1</sup> ) | <b>V<sub>total</sub></b><br>(cm <sup>3</sup> g <sup>-1</sup> ) | <b>V<sub>micro</sub></b><br>(cm <sup>3</sup> g <sup>-1</sup> ) | <b>N<sub>2</sub> 77K</b><br>(cm <sup>3</sup> g <sup>-1</sup> ) | <b>H<sub>2</sub> 77K</b><br>(cm <sup>3</sup> g <sup>-1</sup> ) | <b>CO<sub>2</sub> 273K</b><br>(cm <sup>3</sup> g <sup>-1</sup> ) |
|------------|--------------------------------------------------------------|-------------------------------------------------------------------|----------------------------------------------------------------|----------------------------------------------------------------|----------------------------------------------------------------|----------------------------------------------------------------|----------------------------------------------------------------|------------------------------------------------------------------|
| por-POF-1  | 189                                                          | 250                                                               | 102                                                            | 0.125                                                          | 0.051                                                          | 81                                                             | 91                                                             | 40                                                               |
| por-POF-2  | 340                                                          | 413                                                               | 197                                                            | 0.201                                                          | 0.114                                                          | 139                                                            | 99                                                             | 43                                                               |
| por-POF-3  | 536                                                          | 647                                                               | 310                                                            | 0.296                                                          | 0.207                                                          | 199                                                            | 109                                                            | 50                                                               |
| por-POF-4  | 745                                                          | 899                                                               | 417                                                            | 0.482                                                          | 0.228                                                          | 312                                                            | 132                                                            | 60                                                               |
| por-POF-5  | 545                                                          | 662                                                               | 294                                                            | 0.408                                                          | 0.126                                                          | 234                                                            | 113                                                            | 52                                                               |
| por-POF-6  | 663                                                          | 802                                                               | 425                                                            | 0.363                                                          | 0.168                                                          | 264                                                            | 124                                                            | 56                                                               |
| por-POF-7  | 987                                                          | 1195                                                              | 485                                                            | 0.619                                                          | 0.194                                                          | 400                                                            | 177                                                            | 76                                                               |
| por-POF-8  | 1134                                                         | 1371                                                              | 596                                                            | 0.722                                                          | 0.402                                                          | 466                                                            | 181                                                            | 81                                                               |
| por-POF-9  | 806                                                          | 982                                                               | 543                                                            | 0.448                                                          |                                                                | 290                                                            | 138                                                            | 61                                                               |
| por-POF-10 | 935                                                          | 1137                                                              | 430                                                            | 0.688                                                          | 0.172                                                          | 372                                                            | 144                                                            | 65                                                               |
| por-POF-11 | 1279                                                         | 1546                                                              | 766                                                            | 0.695                                                          | 0.382                                                          | 450                                                            | 198                                                            | 83                                                               |
| por-POF-12 | 1379                                                         | 1664                                                              | 846                                                            | 0.719                                                          | 0.395                                                          | 465                                                            | 205                                                            | 88                                                               |

## E. Demetallation-remetallation of por-POF-8

### 1. ICP-MS

**Table S2** ICP-MS data of por-POF-8-X (X = 2H, FeCl, and Ni)

|                | <sup>64</sup> Zn % | <sup>56</sup> Fe % | <sup>57</sup> Fe % | <sup>60</sup> Ni % |
|----------------|--------------------|--------------------|--------------------|--------------------|
| por-POF-8-2H   | 0.015              | 0.000              | 0.000              | 0.000              |
| por-POF-8-FeCl | 0.008              | 26.41              | 27.36              | 0.023              |
| por-POF-8-Ni   | 0.254              | 0.000              | 0.000              | 3.681              |

### 2. FT-IR spectra

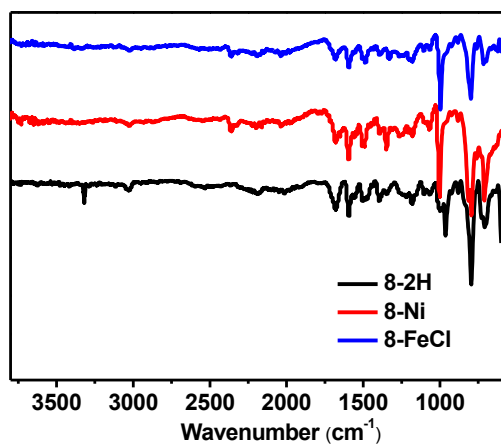

**Fig. S25** FT-IR spectra of por-POF-8-X (X = 2H, FeCl, and Ni).

### 3. N<sub>2</sub>, CO<sub>2</sub>, and H<sub>2</sub> sorption

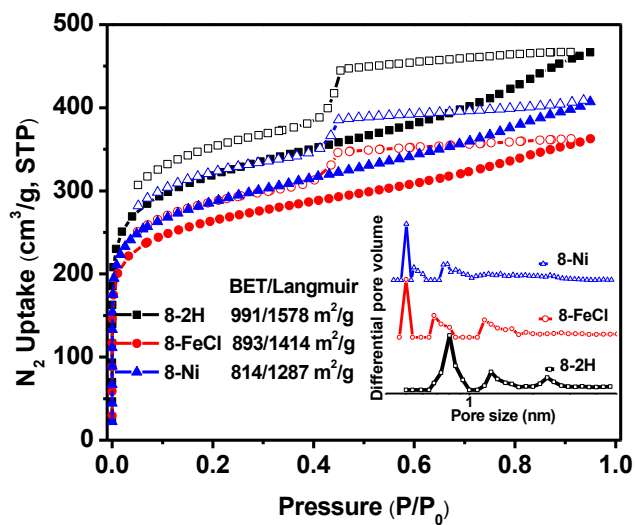

**Fig. S26** N<sub>2</sub> sorption isotherms, showing the hysteresis generated from the mesoporosity, of por-POF-8-X (X = 2H, FeCl, and Ni). The inset shows the pore size distribution calculated by application of nonlocal density functional theory.

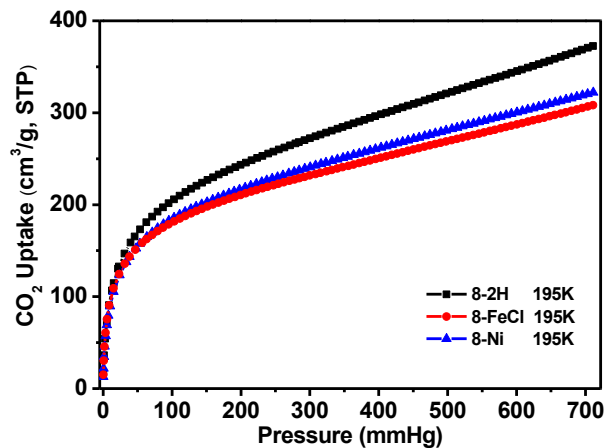

**Fig. S27** CO<sub>2</sub> sorption isotherms of por-POF-8-X (X = 2H, FeCl, and Ni).

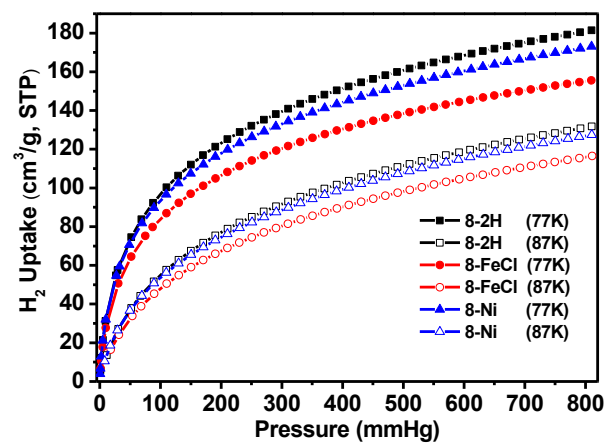

**Fig. S28** H<sub>2</sub> sorption isotherms of por-POF-8-X (X = 2H, FeCl, and Ni).

#### 4. Isotheric heat of adsorption of por-POF-8-X

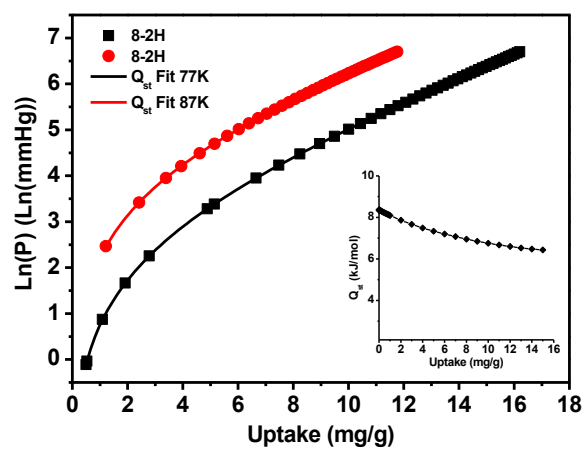

**Fig. S29** Isotheric heat of adsorption of por-POF-8-2H towards  $H_2$ .

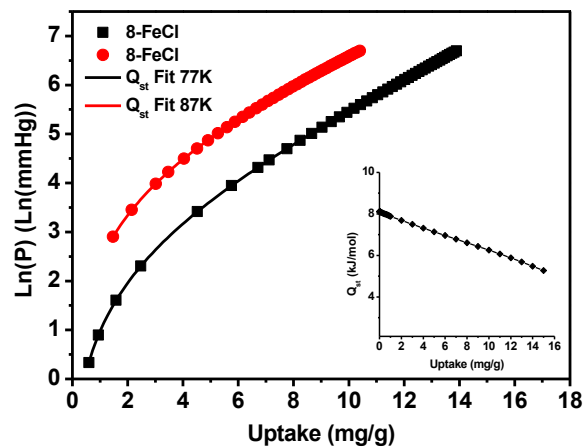

**Fig. S30** Isotheric heat of adsorption of por-POF-8-FeCl towards  $H_2$ .

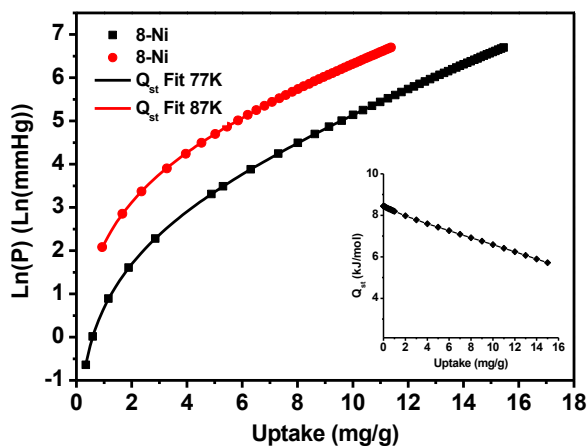

Fig. S31 Isosteric heat of adsorption of por-POF-8-Ni towards H<sub>2</sub>.

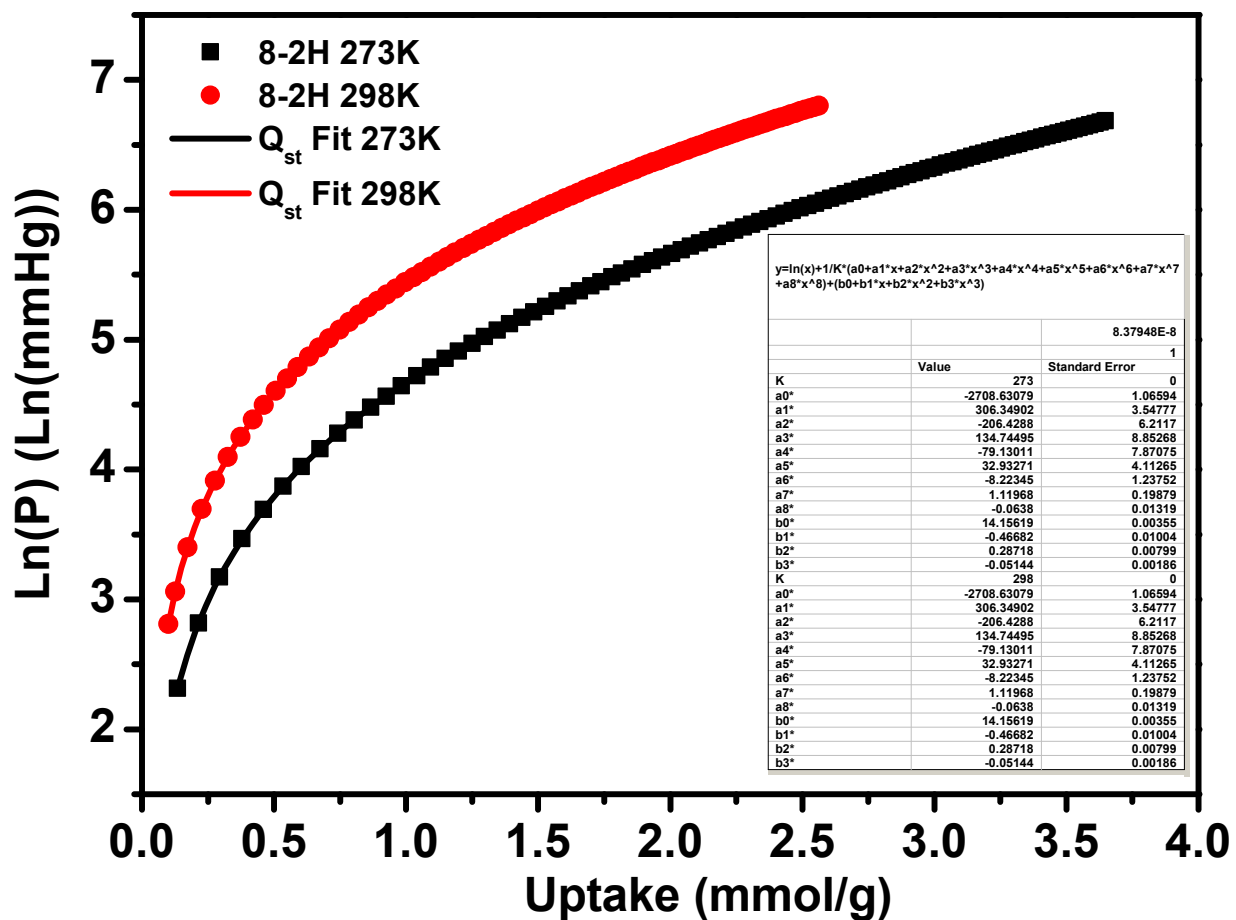

Fig. S32 Isosteric heat of adsorption of por-POF-8-2H towards CO<sub>2</sub>.

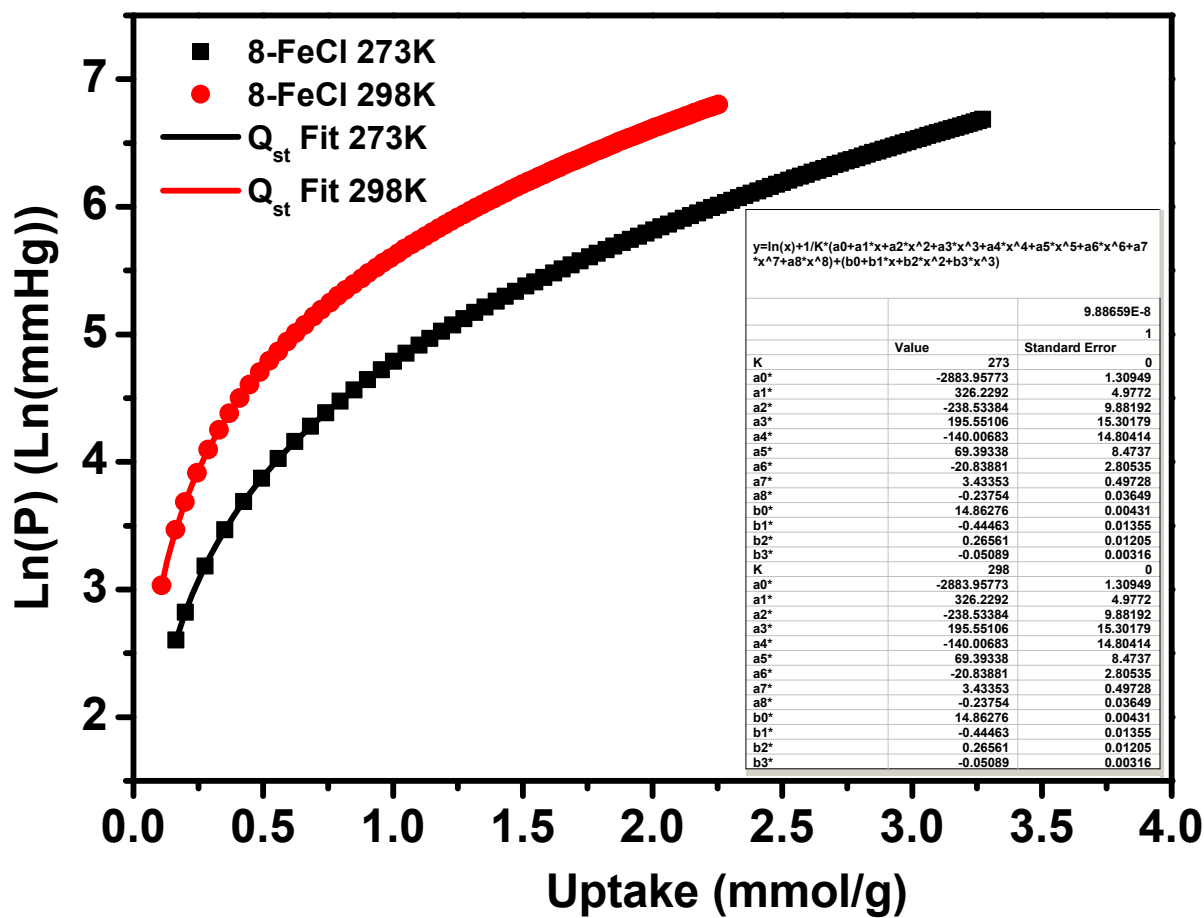

Fig. S33 Isosteric heat of adsorption of por-POF-8-FeCl towards CO<sub>2</sub>.



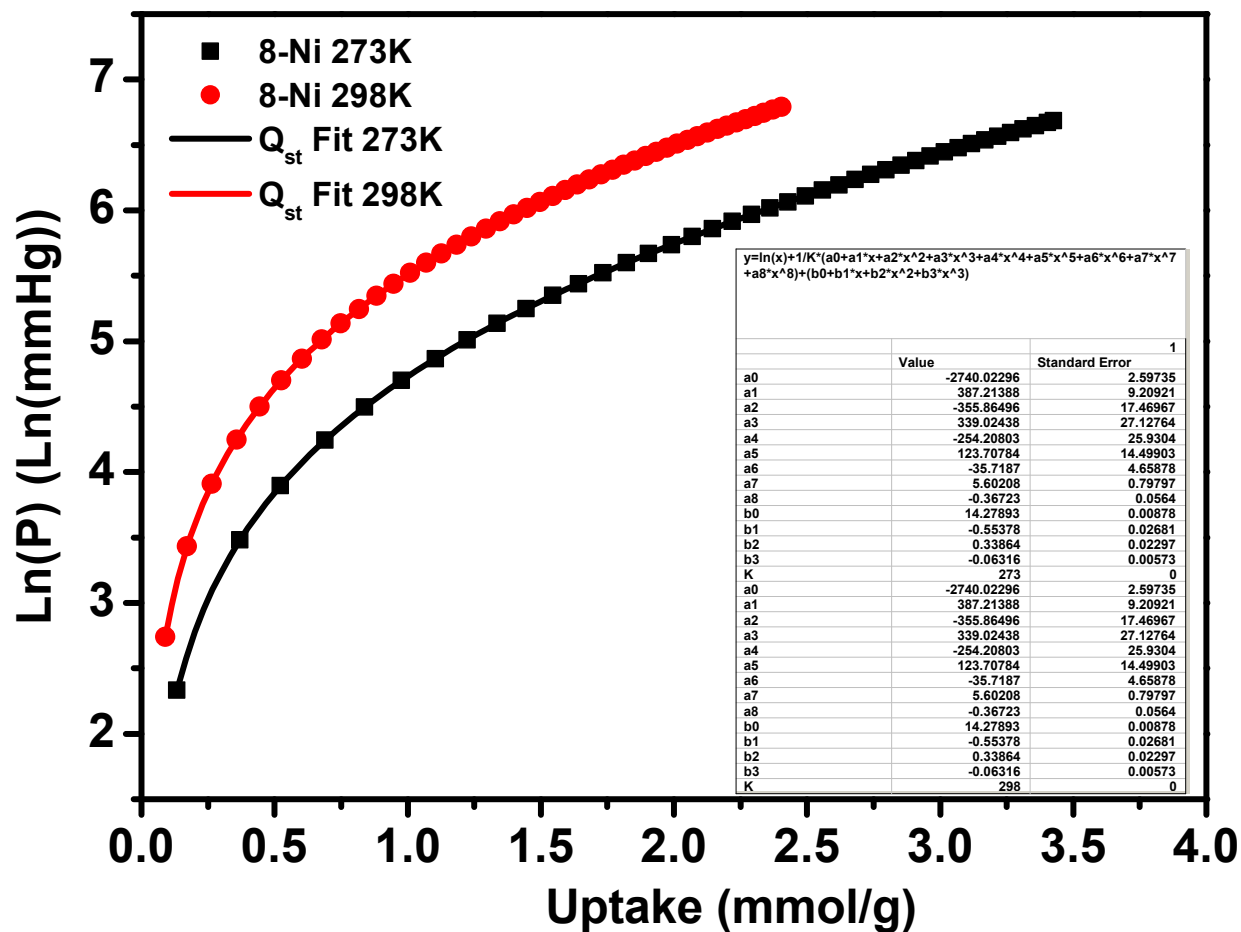

Fig. S34 Isosteric heat of adsorption of por-POF-8-Ni towards  $\text{CO}_2$ .

Table S3 A summary of gas sorption capacities and surface areas of por-POF-8-X (X = 2H, FeCl, and Ni)

|        | $S_{\text{ABET}}/S_{\text{Langmuir}}$<br>( $\text{m}^2 \text{g}^{-1}$ ) | $\text{H}_2$ ( $\text{cm}^3 \text{g}^{-1}$ ) |      | $\text{CO}_2$ ( $\text{cm}^3 \text{g}^{-1}$ ) |       |       |
|--------|-------------------------------------------------------------------------|----------------------------------------------|------|-----------------------------------------------|-------|-------|
|        |                                                                         | 77 K                                         | 87 K | 195 K                                         | 273 K | 298 K |
| 8-2H   | 991/1578                                                                | 176                                          | 132  | 372                                           | 82    | 57    |
| 8-FeCl | 814/1287                                                                | 151                                          | 116  | 308                                           | 73    | 50    |
| 8-Ni   | 893/1414                                                                | 168                                          | 127  | 322                                           | 77    | 54    |

## F. Computational analysis of binding energies

Geometric structure optimization and frequency calculations are performed using a density-functional theory (DFT) method implemented in G09 package. The functional  $\omega$ B97XD is chosen includes dispersion correction. To reduce computing cost, we only focus on smaller systems to evaluate the  $H_2$  and  $CO_2$  adsorption energies on different porphyrin macrocycle. The optimized geometries of four  $H_2$  molecules adsorbed to the same side surface of free base porphyrin (por-2H) or that of metallated porphyrins (por-FeCl and por-Ni) are shown in Figure S35 while the optimized geometries of  $CO_2$  adsorbed to a side surface of por-2H, por-FeCl, or por-Ni are shown in Figure S36. As shown in Figure S35,  $H_2$  cannot be adsorbed vertically above the center of porphyrin macrocycle. We thus only obtain the geometries of four  $H_2$  co-adsorbed on the same side surface of porphyrin macrocycle. On the other hand, as displayed in Figure S36, one of oxygen atoms in  $CO_2$  is located vertically above the center of porphyrin macrocycle. Therefore, only one  $CO_2$  can be adsorbed on a side surface of porphyrin macrocycle.

To obtain more reliable interaction energies (adsorption energies,  $E_{ad}$ ), the basis set superposition error (BSSE) corrections are considered [ $E_{ad}$  is computed according to the formula  $E_{ad} = E_{corrected} - (E(1) + E(2) + \dots E(j) \dots + E(n))$ , where  $E_{corrected} = E_{complex} + E_{BSSE}$ , and  $E(j)$  means the energy associated with monomer centered basis set (MCBS) calculation for fragment  $j$ ]. The computed adsorption energies are listed in Table S1. The order of  $H_2$  binding is por-2H > por-Ni > por-FeCl, but actually the difference in  $H_2$  binding among the three macrocycles is quite small. The average adsorption energies per  $H_2$  computed at the  $\omega$ B97XD/6-311G(d,p) level are -6.08, -5.55 and -4.90 kJ/mol for por-2H, por-Ni, and por-FeCl, respectively. Similarly, the computed  $CO_2$  adsorption energies are almost same for por-2H and por-FeCl. Therefore we can conclude that there is no significant change in the adsorption energies of  $H_2$  and  $CO_2$  adsorption after Ni and  $FeCl_3$  coordinate to the center of porphyrin.

**Table S1** Adsorption energies of H<sub>2</sub> and CO<sub>2</sub> adsorbed to porphyrin and its metal complexes (see Figure S35 and S36 below)

|                                  | $E_{ad}$ , KJ/mol          |
|----------------------------------|----------------------------|
|                                  | $\omega$ B97XD/6-311G(d,p) |
| <b>por-2H - 4H<sub>2</sub></b>   | -24.30                     |
| <b>por-Ni - 4H<sub>2</sub></b>   | -22.21                     |
| <b>por-FeCl - 4H<sub>2</sub></b> | -19.59                     |
| <b>por-2H - CO<sub>2</sub></b>   | -14.38                     |
| <b>por-Ni - CO<sub>2</sub></b>   | -13.32                     |
| <b>por-FeCl - CO<sub>2</sub></b> | -14.49                     |

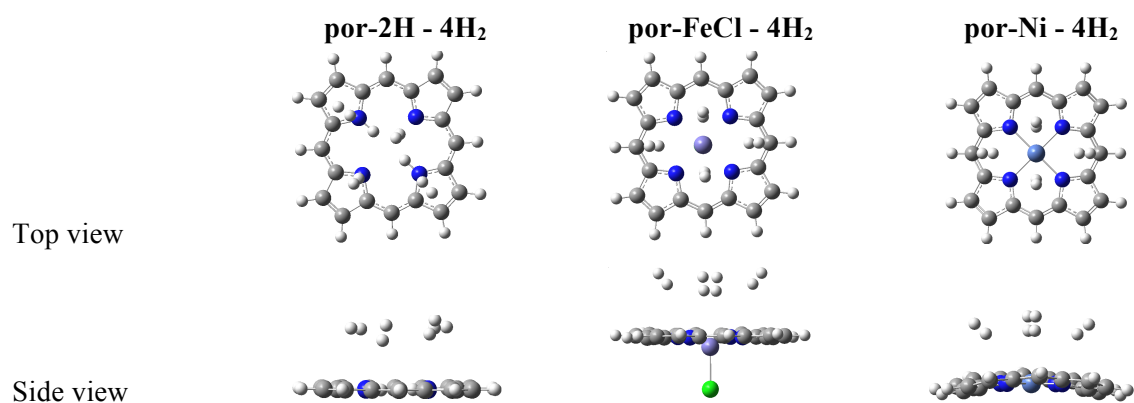

**Fig. S35** Optimized structures by  $\omega$ B97XD/6-311G(d,p) when four H<sub>2</sub> adsorbed on the same side of porphyrin and its metal complexes (grey, carbon; white, hydrogen; blue, nitrogen; green, chlorine; purple, iron; light blue, nickel).

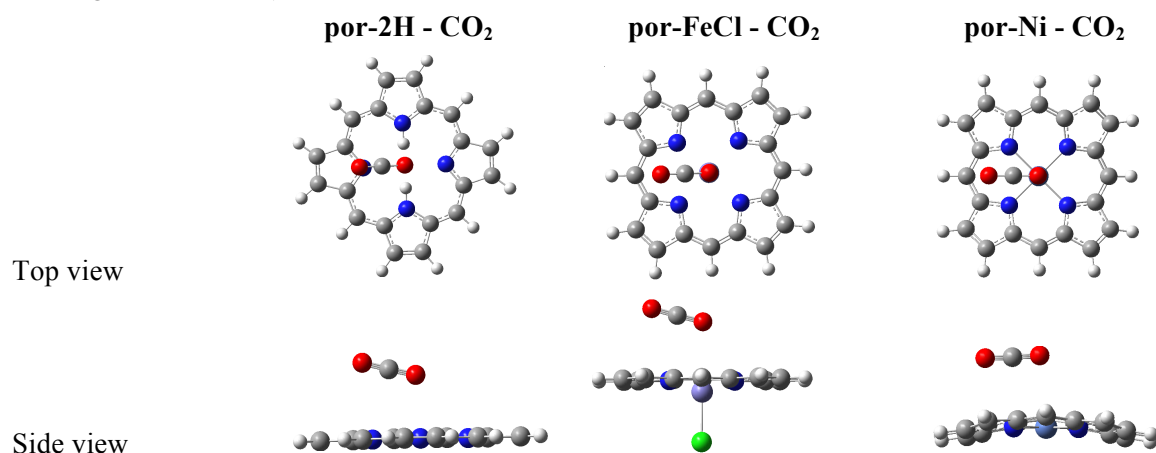

**Fig. S36** Optimized structures by  $\omega$ B97XD/6-311G(d,p) when one CO<sub>2</sub> adsorbed on the same side of porphyrin and its metal complexes (grey, carbon; white, hydrogen; red, oxygen; blue, nitrogen; green, chlorine; purple, iron; light blue, nickel).
